# Supplementary material
Source: Frontiers journal article supplement (https://www.frontiersin.org/articles/436019)
Supplement: Table_1.xlsx [file Table_1.xlsx]

## Sheet: Plan1
Table 1 - Station list of operations conducted during the RGR1 cruise.
Cruise ID:	RGR1
Ship:	Alpha Crucis (University of São Paulo, Brazil)
Ship Station	Date	Time Start	Operation	Location	Latitude (°)	Longitude (°)	Depth (m)
445	2018-02-03	17:00:00	SVP	Area B1	-30.7077	-34.8748	1000
446	2018-02-04	12:05:00	MOO	Area B1	-31.1623	-34.7221	1500
447	2018-02-04	17:18:00	DR01	Area B1	-31.1681	-34.8238	657
448	2018-02-05	10:55:00	SVP	Area B1	-31.1404	-34.8377	1560
449	2018-02-05	12:07:00	DR02	Area B1	-31.1547	-34.8302	887
449	2018-02-05	18:04:00	CTDW	Area B1	-31.1563	-34.8298	859
450	2018-02-06	13:20:00	CTDW	Area B1	-31.3513	-34.844	963
450	2018-02-06	14:20:00	BC01	Area B1	-31.3666	-34.8421	939
451	2018-02-06	16:38:00	BC02	Area B1	-31.4167	-34.8854	1155
452	2018-02-07	04:30:00	CTDW	Area B2	-31.2025	-34.7667	690
453	2018-02-07	05:11:00	CTD	Area B2	-31.1697	-34.7439	1250
454	2018-02-07	06:30:00	CTDW	Area B2	-31.1348	-34.7261	2042
455	2018-02-07	09:10:00	DR03	Area B2	-30.859	-34.7159	675
456	2018-02-07	13:09:00	DR04	Area B2	-30.8515	-34.6863	643
457	2018-02-07	17:10:00	CTD	Central rift	-30.9055	-34.619	1415
458	2018-02-07	18:40:00	CTD	Central rift	-30.9195	-34.6247	1393
459	2018-02-07	20:10:00	CTD	Central rift	-30.9487	-34.6399	1664
460	2018-02-07	21:30:00	CTDW	Central rift	-30.9852	-34.6548	2020
461	2018-02-07	23:18:00	CTD	Central rift	-31.0508	-34.688	2103
462	2018-02-08	01:10:00	CTD	Central rift	-31.0979	-34.7091	2123
463	2018-02-08	03:24:00	CTD	Central rift	-31.025	-34.801	2065
464	2018-02-08	05:58:00	CTD	Central rift	-30.9985	-34.9411	1880
465	2018-02-08	08:00:00	CTD	Central rift	-31.0154	-35.1463	1655
466	2018-02-08	11:00:00	CTD	Central rift	-31.0029	-35.3649	1606
467	2018-02-08	14:00:00	CTDW	Central rift	-30.9579	-35.5637	1600
468	2018-02-08	17:37:00	BC03	Central rift	-30.7434	-35.9832	1525
468	2018-02-08	18:15:00	CTD	Central rift	-30.8331	-35.8098	1545
469	2018-02-08	19:56:00	CTD	Central rift	-30.8337	-35.8092	1544
470	2018-02-08	22:07:00	CTD	Central rift	-30.6697	-35.7747	819
471	2018-02-09	00:24:00	CTD	Central rift	-30.7423	-35.9	1452
472	2018-02-09	02:10:00	CTD	Central rift	-30.7815	-35.9637	1010
473	2018-02-09	12:00:00	DR05	Area A1	-30.7964	-35.9799	683
474	2018-02-09	18:10:00	BC04	Area A1	-30.8713	-35.9571	1200
474	2018-02-09	19:00:00	GC01	Area A1	-30.8705	-35.9561	1210
474	2018-02-09	20:50:00	CTDW	Area A1	-30.8708	-35.9571	1206
475	2018-02-10	09:37:00	CTD/SVP	Area A1	-30.8988	-35.9496	1247
476	2018-02-10	11:37:00	DR06	Area A1	-30.8894	-35.9808	758
477	2018-02-10	14:39:00	DR07	Area A1	-30.8551	-36.0047	699
478	2018-02-10	17:55:00	DR08	Area A1	-30.8431	-35.988	764
479	2018-02-11	10:34:00	DR09	Area A1	-30.7948	-35.989	661
480	2018-02-11	16:10:00	DR10	Area A1	-30.8677	-35.9997	702
481	2018-02-12	10:42:00	CTDW/SVP	Area A1	-31.0833	-36.0837	1807
481	2018-02-12	12:21:00	BC05	Area A1	-31.0808	-36.0767	1772
481	2018-02-12	14:38:00	GC02	Area A1	-31.0797	-36.0778	1790
482	2018-02-12	17:20:00	GC03	Area A1	-31.0199	-36.0893	1600
483	2018-02-12	19:56:00	GC04	Area A1	-31.0411	-36.0811	1641
484	2018-02-13	14:30:00	DR11	Area A1	-31.0094	-36.1788	754
485	2018-02-13	18:44:00	DR12	Area A1	-31.0657	-36.1905	805
485	2018-02-13	21:00:00	CTDW	Area A1	-31.0465	-36.1993	748
486	2018-02-14	10:51:00	GC07	Area A1	-31.0905	-36.0807	1824
489	2018-02-14	17:27:00	GC08	Area A1	-31.097	-36.2495	1024
489	2018-02-14	18:23:00	GC09	Area A1	-31.0972	-36.2496	1024
489	2018-02-14	19:34:00	GC10	Area A1	-31.0984	-36.2499	1029
490	2018-02-15	12:00:00	BC07	Area A1	-30.9358	-36.2627	830
490	2018-02-15	11:54:00	GC11	Area A1	-30.9363	-36.2628	830
490	2018-02-15	09:47:00	CTDW	Area A1	-30.9368	-36.262	832
491	2018-02-15	14:53:00	DR13	Area A1	-30.9343	-35.9734	711
492	2018-02-15	17:07:00	DR14	Area A1	-31.0292	-35.9397	1044
493	2018-02-16	13:45:00	GC12	Central rift	-30.8961	-35.7188	1572
494	2018-02-16	15:18:00	GC13	Central rift	-30.8385	-35.8111	1547
494	2018-02-16	16:35:00	BC08	Central rift	-30.837	-35.8109	1547
494	2018-02-16	17:54:00	CTDW	Central rift	-30.8391	-35.8108	1549
495	2018-02-16	19:25:00	GC14	Central rift	-30.8594	-35.9068	1400
496	2018-02-16	21:20:00	GC15	Central rift	-30.8019	-35.9417	1334
497	2018-02-16	23:00:00	CTDW	Central rift	-30.7427	-35.9008	1450
498	2018-02-17	11:48:00	DR15	Area A2	-30.619	-35.7601	655
499	2018-02-17	13:18:00	DR16	Area A2	-30.6315	-35.736	639
500	2018-02-17	16:04:00	DR17	Area A2	-30.7013	-35.718	683
501	2018-02-17	19:11:00	GC16	Area A2	-30.6497	-35.8041	1225
502	2018-02-17	19:49:00	GC17	Area A2	-30.6536	-35.8035	1197
