# Supplementary material
Source: Frontiers journal article supplement (https://www.frontiersin.org/articles/436019)
Supplement: Table_4.xls [file Table_4.xls]

## Sheet: Sheet1
Table 4 - List of box corers recovered.
Box corer number	Date	On bottom				Sediment type
		Depth (m)	Time GMT	Latitude (°)	Longitude (°)
BC01	2018-02-06	935	1899-12-31 15:00:00	-31.3787	-34.8382	Coarse foraminifer sand
BC02	2018-02-06	1155	1899-12-31 17:06:00	-31.4167	-34.8854	Coarse foraminifer sand
BC03	2018-02-08	1552	1899-12-31 17:48:00	-30.8701	-35.7169	Muddy foraminifer sand
BC04	2018-02-09	1230	1899-12-31 16:27:00	-30.8698	-35.9547	Coarse foraminifer sand
BC05/06	2018-02-12	1810	1899-12-31 10:42:00	-31.0666	-36.0862	-
BC07	2018-02-15	1238	1899-12-31 10:56:00	-30.9358	-36.2627	Pteropod ooze
BC08	2018-02-16	1566	1899-12-31 16:50:00	-30.8377	-35.8122	Coarse foraminifer sand with a thin layers of mud
