# Supplementary material
Source: Frontiers journal article supplement (https://www.frontiersin.org/articles/436019)
Supplement: Table_5.xls [file Table_5.xls]

## Sheet: Sheet1
Dredge number	On bottom			Organisms collected
	Latitude (°)	Longitude (°)	Water depth (m)
D01	-31.1686	-34.8205	661	-
D02	-31.1561	-34.83	851	Small sponges and octocorals, solitary corals, bivalves and a chiton
D03	-30.8691	-34.6918	658	Fish, corals, sponges, starfish, pycnogonids, sea urchins, annelids and barnacles
D04	-30.8645	-34.7146	668	Hard corals, small sponges and annelids
D05	-30.7964	-35.9799	683	Sponges, small solitary corals and annelids
D06	-30.8891	-35.9838	741	Squid, sponges, hard corals, annelids and barnacles
D07	-30.8542	-36.0087	687	Bamboo coral, fossilized megalodont tooth, sponges, annelids and crustaceans
D08	-30.8464	-35.9923	730	Sponges and annelids
D09	-30.7946	-35.9943	654	Sponges, annelids and barnacles
D10	-30.8679	-35.9999	701	Annelids and small crustaceans
D11	-31.0094	-36.1788	754	Black corals and annelids
D12	-31.0657	-36.1905	805	Black corals and annelids
D13	-30.9343	-35.9734	711	Coral-like sponge and crinoid
D14	-31.0258	-35.9397	1044	-
D15	-30.619	-35.7768	655	Small sponges
D16	-30.6375	-35.739	641	Black corals and sponges
D17	-30.7013	-35.7184	686	Encrusting and rock burrowing sponges, solitary corals, crustaceans and annelids
