# Supplementary material
Source: Frontiers journal article supplement (https://www.frontiersin.org/articles/436019)
Supplement: Table_6.xls [file Table_6.xls]

## Sheet: Sheet1
Table 6 - List of water, sediment and Fe-Mn crusts sampling for geomicrobiology.
Ship Station	Latitude (°)	Longitude (°)	Bottom depth (m)	Operation /Number	Sample Type	Number of samples
S0449	-31.1561	-34.83	851	DR02	Crust	1 crust
S0449	-31.1563	-34.8298	859	CDTW	Water	6 water depths
S0450	-31.368	-34.844	963	CDTW	Water	12 water depths
S0450	-32.368	-35.844	963	BC1	Sediment	2 subcorers
S0451	-31.4167	-34.8854	1155	BC2	Sediment	2 subcorers
S0452	-31.204	-34.7613	701	CDTW	Water	4 water depths
S0454	-31.1343	-34.7267	2041	CDTW	Water	6 water depths
S0457	-30.9055	-34.619	815	CDTW	Water	4 water depths
S0468	-30.8701	-35.7169	1552	BC3	Sediment	2 subcorers
S0468	-30.8912	-35.7168	1565	CDTW	Water	5 water depths
S0470	-30.6697	-35.7747	819	CDTW	Water	4 water depths
S0472	-30.7815	-35.9637	1010	CDTW	Water	4 water depths
S0473	-30.7964	-35.9799	685	DR05	Crust	3 crust
S0474	-30.8698	-35.9547	1230	BC4	Sediment	2 subcorers
S0474	-30.8698	-35.956	1203	CDTW	Water	4 water depths
S0475	-30.8997	-35.9497	1246	CDTW	Water	10 water depths
S0476	-30.7964	-35.9799	685	DR06	Crust	2 crust
S0477	-30.8542	-36.008	686	DR07	Crust	2 crust
S0479	-30.7953	-35.9956	651	DR09	Crust	2 crust
S0480	-30.8679	-35.9999	702	DR10	Crust	2 crust
S0480	-30.8637	-35.9993	704	CDTW	Water	4 water depths
S0481	-31.0833	-36.0837	1807	CDTW	Water	13 water depths
S0484	-31.0094	-36.1787	775	DR11	Crust	2 crust
S0485	-31.0465	-36.1993	748	CDTW	Water	4 water depths
S0500	-30.9368	-36.262	826	CDTW	Water	4 water depths
S0500	-30.9368	-36.262	1238	BC6	Sediment	2 subcorers
S0504	-30.8387	-35.8113	1566	BC7	Sediment	2 subcorers
S0507	-30.7427	-35.8998	1449	CDTW	Water	5 water depths
S0509	-30.6374	-35.7391	638	DR15	Crust	1 crust
S0510	-30.7013	-35.7184	686	DR17	Crust	2 crust
