# Supplementary material
Source: Frontiers journal article supplement (https://www.frontiersin.org/articles/436019)
Supplement: Table_7.xlsx [file Table_7.xlsx]

## Sheet: Plan1
Table 7 - List of water of parameters measured by the CTD at station 454.
Station 461
Latitude (°)	-31.0507
Longitude (°)	-34.688
Local Depth (m)	2103
Depth (m)	Temperature (ºC)	Salinity (PSU)	Oxygen (mg/L)	Chlorophyll-a (RFU)
-5	23.5339	35.8502	6.91268	0.487339
-6	23.5328	35.8507	6.91257	0.493745
-7	23.532	35.851	6.87524	0.483036
-8	23.5326	35.8508	6.8846	0.48017
-9	23.5326	35.8507	6.82963	0.496568
-10	23.5336	35.8513	6.82707	0.468385
-11	23.5329	35.8509	6.81536	0.482247
-12	23.5332	35.8511	6.76483	0.48531
-13	23.5328	35.8511	6.77486	0.498348
-14	23.5273	35.8504	6.76067	0.503899
-15	23.5174	35.8495	6.74692	0.506511
-16	23.5108	35.8482	6.791	0.553967
-17	23.5106	35.8489	6.82508	0.480158
-18	23.5131	35.8489	6.8515	0.482523
-19	23.5095	35.8484	6.8624	0.481583
-20	23.5074	35.8479	6.814	0.471725
-21	23.487	35.8476	6.80412	0.467874
-22	23.4932	35.8467	6.82157	0.471968
-23	23.4857	35.8468	6.86099	0.481249
-24	23.4945	35.8474	6.8564	0.47714
-25	23.4876	35.8458	6.81558	0.439071
-26	23.4728	35.8453	6.81579	0.455081
-27	23.4846	35.8462	6.85094	0.459236
-28	23.4862	35.8458	6.8815	0.478752
-29	23.4791	35.8451	6.86949	0.484556
-30	23.4707	35.8449	6.87669	0.467024
-31	23.4747	35.8449	6.87153	0.463614
-32	23.4661	35.8439	6.8344	0.482173
-33	23.465	35.8444	6.84253	0.464385
-34	23.4675	35.8443	6.85298	0.477772
-35	23.459	35.8437	6.87868	0.457309
-36	23.4623	35.8436	6.86334	0.481102
-37	23.4585	35.8436	6.86491	0.493847
-38	23.4397	35.8425	6.87662	0.486469
-39	23.441	35.8428	6.8723	0.485222
-40	23.4518	35.843	6.87198	0.451521
-41	23.4543	35.8434	6.87447	0.471091
-42	23.4168	35.8408	6.88089	0.487616
-43	23.3406	35.8379	6.88385	0.48826
-44	23.2744	35.8414	6.89351	0.512853
-45	23.2347	35.8389	6.90751	0.495066
-46	23.1474	35.8413	6.94345	0.471324
-47	23.0299	35.8379	6.94544	0.487949
-48	22.5347	35.825	7.00994	0.507505
-49	20.9421	35.8926	7.11218	0.538245
-50	20.6783	35.9207	7.23003	0.56612
-51	20.5564	35.9014	7.41777	0.588771
-52	20.185	35.9191	7.45411	0.618224
-53	20.0455	35.9216	7.43511	0.628588
-54	19.925	35.9249	7.47085	0.656859
-55	19.8926	35.9231	7.49489	0.678683
-56	19.8532	35.9179	7.53016	0.710233
-57	19.8159	35.9172	7.55468	0.715433
-58	19.7912	35.9131	7.51132	0.689568
-59	19.7327	35.9122	7.4707	0.692074
-60	19.7053	35.9125	7.52283	0.749261
-61	19.663	35.9089	7.53117	0.742059
-62	19.6193	35.9097	7.52788	0.741787
-63	19.5822	35.9071	7.46937	0.77107
-64	19.5292	35.9075	7.47264	0.776778
-65	19.5132	35.9059	7.49673	0.753375
-66	19.4623	35.9049	7.47306	0.756463
-67	19.4539	35.9066	7.46557	0.735316
-68	19.4361	35.9054	7.45439	0.741282
-69	19.3924	35.9048	7.45461	0.737035
-70	19.4046	35.9041	7.48593	0.831245
-71	19.3785	35.8962	7.52572	0.779346
-72	19.2611	35.8984	7.48485	0.780571
-73	19.2403	35.9	7.43625	0.76082
-74	19.2222	35.8955	7.43044	0.772718
-75	19.1701	35.8951	7.45104	0.817287
-76	19.1664	35.8934	7.44623	0.865849
-77	19.1514	35.8905	7.46364	0.816756
-78	19.0866	35.8853	7.45413	0.817373
-79	19.0238	35.8851	7.45149	0.790669
-80	18.9862	35.8835	7.45989	0.847927
-81	18.9597	35.8826	7.42202	0.876484
-82	18.905	35.8775	7.47755	0.85063
-83	18.8357	35.8772	7.43435	0.87427
-84	18.7883	35.8763	7.40445	0.938797
-85	18.7282	35.869	7.42169	0.961982
-86	18.4319	35.8587	7.48953	0.988686
-87	18.2047	35.8585	7.40578	1.0719
-88	18.1351	35.839	7.35592	1.1603
-89	18.0525	35.8244	7.39392	1.40098
-90	18.0362	35.8217	7.40732	1.59468
-91	18.0145	35.8148	7.37846	1.6681
-92	17.9834	35.8092	7.36685	1.83876
-93	17.9508	35.8048	7.40597	1.98162
-94	17.9089	35.8025	7.42596	1.94523
-95	17.8718	35.8026	7.40303	1.98423
-96	17.8599	35.8034	7.32879	1.98161
-97	17.8559	35.802	7.31248	2.03461
-98	17.8691	35.8007	7.35717	2.33294
-99	17.8331	35.7991	7.39764	2.418
-100	17.8168	35.7997	7.35766	2.21908
-101	17.8012	35.7995	7.32735	2.17066
-102	17.7933	35.8005	7.30729	2.13044
-103	17.7786	35.8008	7.32817	2.09928
-104	17.7626	35.8011	7.29217	2.17768
-105	17.7176	35.8018	7.31599	2.19758
-106	17.6801	35.8024	7.35194	2.05928
-107	17.6586	35.8046	7.31434	1.97822
-108	17.6572	35.8052	7.27311	1.83818
-109	17.658	35.8096	7.23186	1.80625
-110	17.6675	35.8188	7.18046	1.8019
-111	17.6445	35.8251	7.21422	1.9249
-112	17.6058	35.8211	7.24798	1.98576
-113	17.5033	35.8161	7.26006	1.89061
-114	17.4383	35.8077	7.24769	1.75632
-115	17.3981	35.8042	7.22145	1.71378
-116	17.383	35.8028	7.20751	1.64273
-117	17.363	35.7994	7.16753	1.6013
-118	17.3742	35.8005	7.16423	1.68653
-119	17.3578	35.7966	7.18415	1.75451
-120	17.3146	35.7946	7.18662	1.58869
-121	17.2804	35.7932	7.15362	1.5226
-122	17.2515	35.7904	7.13459	1.4659
-123	17.2065	35.7895	7.14382	1.41418
-124	17.1788	35.7852	7.15315	1.39995
-125	17.1444	35.7848	7.12795	1.4441
-126	17.1048	35.779	7.10884	1.45008
-127	17.0085	35.7735	7.1446	1.48228
-128	16.9354	35.7734	7.11985	1.47324
-129	16.9013	35.7746	7.1028	1.45167
-130	16.8963	35.7747	7.06766	1.3595
-131	16.9089	35.7745	7.00491	1.33546
-132	16.8879	35.7747	7.01112	1.39603
-133	16.8656	35.7733	7.03707	1.43395
-134	16.8355	35.7707	7.03875	1.3815
-135	16.8178	35.769	7.04674	1.32545
-136	16.7934	35.7654	7.02677	1.2828
-137	16.7745	35.7639	6.98232	1.2362
-138	16.7679	35.7637	6.96029	1.20377
-139	16.754	35.7602	6.97832	1.194
-140	16.7321	35.7576	6.98144	1.26048
-141	16.715	35.7552	6.99697	1.2689
-142	16.706	35.7548	7.0242	1.25968
-143	16.6992	35.7528	7.01705	1.21838
-144	16.6943	35.7521	7.02051	1.19591
-145	16.6927	35.7515	7.01222	1.2089
-146	16.6907	35.7509	7.01451	1.16637
-147	16.6878	35.7504	6.99997	1.13576
-148	16.6831	35.7491	6.99538	1.14348
-149	16.6628	35.7462	7.01146	1.11988
-150	16.6451	35.7451	7.01877	1.07688
-151	16.6247	35.743	7.01538	1.02444
-152	16.5827	35.7378	6.99539	0.977303
-153	16.5554	35.7373	6.97685	0.937681
-154	16.5378	35.7341	6.95931	0.940875
-155	16.5225	35.7334	6.95613	0.916846
-156	16.5107	35.732	6.9692	0.858504
-157	16.5073	35.7316	6.99176	0.836594
-158	16.5005	35.7305	6.99861	0.837186
-159	16.4934	35.7303	6.99882	0.829684
-160	16.4822	35.7288	6.97288	0.815815
-161	16.462	35.7267	6.99121	0.795269
-162	16.4571	35.7262	7.00035	0.784971
-163	16.4546	35.7259	7.00299	0.754492
-164	16.4524	35.7257	6.98997	0.735008
-165	16.4514	35.7252	6.96361	0.743006
-166	16.4419	35.7235	6.94431	0.751125
-167	16.4103	35.7204	6.95393	0.747705
-168	16.3757	35.7187	6.98843	0.745551
-169	16.3445	35.7193	7.0057	0.716867
-170	16.3233	35.7164	7.00808	0.682102
-171	16.2646	35.7115	6.99291	0.651378
-172	16.2411	35.7118	6.93049	0.633295
-173	16.2436	35.7059	6.93351	0.601878
-174	16.1957	35.7035	6.97534	0.573037
-175	16.1319	35.6935	6.95069	0.56794
-176	16.0677	35.6913	6.94429	0.5272
-177	16.0661	35.6898	6.93111	0.492033
-178	16.0292	35.686	6.90274	0.474391
-179	16.0226	35.6854	6.87588	0.46001
-180	16.0006	35.6818	6.89348	0.452901
-181	15.9818	35.6804	6.91134	0.452747
-182	15.9789	35.68	6.9099	0.434041
-183	15.9668	35.6767	6.90606	0.43616
-184	15.9292	35.6714	6.90298	0.407846
-185	15.8632	35.6627	6.89462	0.375553
-186	15.8251	35.6622	6.86438	0.349553
-187	15.8252	35.6608	6.85927	0.323906
-188	15.7993	35.6571	6.86677	0.328526
-189	15.7709	35.6527	6.84575	0.335679
-190	15.7177	35.6456	6.82924	0.322284
-191	15.6638	35.64	6.85085	0.311376
-192	15.6455	35.6384	6.84686	0.294817
-193	15.6469	35.6389	6.81689	0.285758
-194	15.6567	35.6368	6.81974	0.279597
-195	15.6012	35.6303	6.85062	0.280463
-196	15.5875	35.6298	6.87155	0.287137
-197	15.5833	35.6288	6.84978	0.279323
-198	15.5792	35.6273	6.82162	0.30049
-199	15.5599	35.6233	6.80267	0.287941
-200	15.5104	35.6184	6.82814	0.278328
-205	15.4591	35.6113	6.80466	0.271224
-210	15.4013	35.6029	6.78608	0.261954
-215	15.3281	35.5938	6.76893	0.248329
-220	15.3022	35.5905	6.77737	0.249753
-225	15.2883	35.5886	6.78426	0.251515
-230	15.272	35.5865	6.74432	0.242098
-235	15.1979	35.5737	6.7542	0.244682
-240	15.0798	35.5566	6.72671	0.244902
-245	14.9901	35.5477	6.70965	0.239061
-250	14.8768	35.5328	6.69351	0.233249
-255	14.7906	35.5266	6.68116	0.228565
-260	14.7657	35.5244	6.68623	0.229222
-265	14.7398	35.5217	6.67988	0.22159
-270	14.7101	35.5184	6.66873	0.218882
-275	14.6757	35.5142	6.65251	0.233089
-280	14.5867	35.5035	6.68673	0.22842
-285	14.549	35.4981	6.66504	0.22419
-290	14.4528	35.4864	6.66221	0.222889
-295	14.4091	35.4802	6.65724	0.225554
-300	14.3498	35.4714	6.66394	0.233296
-305	14.1879	35.4484	6.6626	0.227529
-310	14.1058	35.4386	6.66915	0.231517
-315	13.9578	35.4171	6.67926	0.222291
-320	13.7898	35.3868	6.63627	0.221716
-325	13.5452	35.3464	6.65978	0.223121
-330	13.4181	35.3246	6.63469	0.222418
-335	13.2662	35.2978	6.6373	0.220376
-340	13.1155	35.2743	6.58444	0.216459
-345	13.0783	35.2666	6.59592	0.224352
-350	13.0553	35.2614	6.5965	0.226211
-355	13.001	35.2506	6.62702	0.224608
-360	12.8922	35.2336	6.60423	0.227111
-365	12.6874	35.2011	6.55906	0.217777
-370	12.6362	35.1925	6.58204	0.221008
-375	12.5947	35.1844	6.58932	0.230253
-380	12.4737	35.1647	6.57608	0.230139
-385	12.3709	35.1489	6.52344	0.218367
-390	12.3478	35.1438	6.55235	0.22862
-395	12.3159	35.1383	6.55845	0.230019
-400	12.1965	35.1195	6.53804	0.230234
-405	12.1254	35.1085	6.55051	0.227355
-410	11.9486	35.0834	6.51987	0.232756
-415	11.9316	35.0799	6.50479	0.230445
-420	11.92	35.0768	6.53027	0.240899
-425	11.8135	35.0609	6.50985	0.238393
-430	11.6351	35.0354	6.50301	0.22754
-435	11.4309	35.0062	6.4986	0.244679
-440	11.297	34.987	6.48716	0.228273
-445	11.2127	34.9743	6.48587	0.228383
-450	11.081	34.9551	6.50464	0.23762
-455	10.9691	34.9397	6.47832	0.239712
-460	10.8135	34.9177	6.48216	0.241891
-465	10.6588	34.8981	6.47879	0.242962
-470	10.5066	34.8757	6.46884	0.235216
-475	10.248	34.8441	6.46481	0.236936
-480	10.1846	34.8325	6.50788	0.242007
-485	10.0674	34.8175	6.48865	0.24187
-490	9.97209	34.8055	6.50554	0.243118
-495	9.93014	34.7987	6.50474	0.236238
-500	9.86294	34.7892	6.50959	0.239732
-505	9.77134	34.7777	6.51247	0.2349
-510	9.63644	34.7614	6.49943	0.228901
-515	9.51673	34.7468	6.51257	0.242985
-520	9.46645	34.7393	6.54359	0.233729
-525	9.33378	34.7221	6.50704	0.234785
-530	9.14045	34.7004	6.55188	0.233657
-535	9.02782	34.6859	6.56316	0.240478
-540	8.81745	34.6605	6.58727	0.238514
-545	8.61543	34.6391	6.55677	0.238319
-550	8.57768	34.6324	6.56709	0.246442
-555	8.52771	34.6259	6.57675	0.238904
-560	8.39632	34.6121	6.5691	0.242749
-565	8.33012	34.6054	6.59491	0.240441
-570	8.30187	34.6013	6.59088	0.245782
-575	8.21558	34.5925	6.60128	0.239151
-580	8.13822	34.5841	6.61042	0.240748
-585	8.10742	34.5797	6.62626	0.24307
-590	7.98966	34.5669	6.61836	0.235267
-595	7.82732	34.5493	6.65944	0.243665
-600	7.76321	34.5403	6.63872	0.242875
-605	7.73418	34.5355	6.63162	0.242187
-610	7.65236	34.5269	6.62803	0.240582
-615	7.55338	34.5154	6.66252	0.248129
-620	7.36256	34.4967	6.69956	0.245075
-625	7.30538	34.4897	6.72279	0.248831
-630	7.23587	34.4821	6.70831	0.24798
-635	7.15604	34.4729	6.72984	0.248351
-640	7.01153	34.4595	6.81	0.246623
-645	6.88874	34.4477	6.83678	0.239868
-650	6.87724	34.4457	6.87386	0.235964
-655	6.83475	34.4393	6.88595	0.24672
-660	6.69701	34.4263	6.82216	0.246448
-665	6.637	34.4199	6.8576	0.24513
-670	6.54685	34.4097	6.87766	0.243428
-675	6.38882	34.3964	6.89864	0.241056
-680	6.34764	34.3914	6.96875	0.248106
-685	6.29142	34.3855	6.96526	0.249777
-690	6.1918	34.3764	6.9838	0.249511
-695	6.10864	34.3686	7.03149	0.24437
-700	6.03091	34.361	7.08101	0.242092
-705	5.99512	34.3577	7.07071	0.250365
-710	5.9725	34.3552	7.0685	0.243113
-715	5.89205	34.3467	7.0892	0.238606
-720	5.8389	34.3423	7.1257	0.241129
-725	5.80652	34.3391	7.12412	0.245069
-730	5.78102	34.3367	7.1521	0.242818
-735	5.74086	34.3336	7.15331	0.241732
-740	5.69559	34.3296	7.15211	0.24333
-745	5.6588	34.3284	7.15804	0.246487
-750	5.62945	34.3277	7.11544	0.253338
-755	5.55849	34.3245	7.07903	0.250888
-760	5.51144	34.3212	7.08412	0.255891
-765	5.45419	34.3162	7.08942	0.25018
-770	5.39565	34.3123	7.12108	0.251819
-775	5.3658	34.3098	7.12779	0.252745
-780	5.33328	34.3076	7.14637	0.244156
-785	5.30072	34.3057	7.13258	0.242335
-790	5.26558	34.3027	7.14067	0.247312
-795	5.24243	34.3016	7.1424	0.24238
-800	5.21232	34.3007	7.13374	0.248334
-805	5.17786	34.2982	7.12477	0.243571
-810	5.16028	34.2975	7.1135	0.251242
-815	5.13861	34.2972	7.12847	0.249208
-820	5.10249	34.2961	7.09195	0.253206
-825	5.01073	34.2914	7.09629	0.257471
-830	4.95445	34.2883	7.11319	0.255017
-835	4.94162	34.2872	7.11226	0.256494
-840	4.93914	34.2866	7.11561	0.252867
-845	4.91208	34.2844	7.11847	0.255601
-850	4.87267	34.2815	7.13402	0.252489
-855	4.79909	34.279	7.1287	0.2588
-860	4.77498	34.2772	7.13901	0.259291
-865	4.71694	34.2725	7.15988	0.250848
-870	4.60148	34.2672	7.18794	0.260833
-875	4.55046	34.2669	7.19662	0.254184
-880	4.4986	34.2698	7.1658	0.249732
-885	4.47617	34.2694	7.1283	0.254405
-890	4.46297	34.2691	7.14321	0.252007
-895	4.44447	34.2687	7.14356	0.25625
-900	4.41028	34.269	7.15042	0.259171
-905	4.39141	34.2702	7.12437	0.257227
-910	4.38746	34.2701	7.08925	0.254415
-915	4.36528	34.2705	7.096	0.255381
-920	4.34983	34.2703	7.08786	0.249587
-925	4.33674	34.2699	7.0765	0.255746
-930	4.32156	34.27	7.08595	0.252409
-935	4.29883	34.2699	7.0798	0.249081
-940	4.22221	34.2732	7.05208	0.247894
-945	4.16011	34.2765	6.99791	0.250751
-950	4.13324	34.2777	6.96885	0.257368
-955	4.11965	34.2784	6.97154	0.261741
-960	4.08941	34.2803	6.92332	0.260655
-965	4.06089	34.2822	6.92831	0.257175
-970	4.03048	34.2853	6.88902	0.259905
-975	4.01163	34.2866	6.85923	0.259406
-980	3.98847	34.286	6.8543	0.259009
-985	3.9343	34.2875	6.85585	0.246913
-990	3.90843	34.2891	6.81972	0.250392
-995	3.88663	34.2909	6.81071	0.262924
-1000	3.86003	34.2935	6.7947	0.264157
-1005	3.8205	34.2969	6.75549	0.261256
-1010	3.80918	34.2974	6.72662	0.257621
-1015	3.80055	34.2977	6.72926	0.262824
-1020	3.79277	34.2982	6.73209	0.25725
-1025	3.78172	34.2986	6.71514	0.25556
-1030	3.77753	34.2985	6.71867	0.261923
-1035	3.7622	34.2979	6.70561	0.258188
-1040	3.74863	34.2997	6.71082	0.253924
-1045	3.74668	34.3003	6.70721	0.259851
-1050	3.73577	34.3022	6.70208	0.264813
-1055	3.75381	34.3059	6.64918	0.254207
-1060	3.76345	34.3083	6.65595	0.254683
-1065	3.75861	34.311	6.61866	0.260617
-1070	3.75517	34.3141	6.59082	0.258723
-1075	3.74661	34.3143	6.56534	0.253529
-1080	3.7431	34.3146	6.58357	0.25092
-1085	3.73838	34.3175	6.56864	0.25308
-1090	3.73561	34.3182	6.5515	0.262128
-1095	3.72181	34.3195	6.55363	0.254761
-1100	3.69807	34.3217	6.52445	0.26213
-1105	3.69246	34.3223	6.53555	0.268225
-1110	3.69049	34.3227	6.53836	0.267027
-1115	3.68554	34.3233	6.52711	0.261171
-1120	3.67496	34.3248	6.52212	0.26638
-1125	3.65093	34.3259	6.52299	0.262343
-1130	3.62337	34.3291	6.48542	0.26338
-1135	3.59995	34.3284	6.46004	0.257237
-1140	3.58677	34.3288	6.49132	0.259391
-1145	3.58294	34.3307	6.47503	0.260949
-1150	3.57498	34.3332	6.45104	0.263409
-1155	3.5714	34.3361	6.45276	0.257505
-1160	3.55391	34.3411	6.41298	0.261484
-1165	3.54148	34.3435	6.39367	0.270921
-1170	3.51158	34.3468	6.39298	0.265382
-1175	3.47581	34.3527	6.38596	0.273794
-1180	3.43627	34.3598	6.34707	0.272666
-1185	3.41759	34.3622	6.31368	0.272892
-1190	3.39736	34.3642	6.31008	0.273572
-1195	3.38326	34.3659	6.2847	0.266446
-1200	3.37584	34.3668	6.29089	0.277994
-1205	3.36484	34.3684	6.26333	0.274928
-1210	3.35754	34.3709	6.27902	0.276202
-1215	3.3501	34.3756	6.26295	0.283569
-1220	3.32691	34.382	6.25325	0.278434
-1225	3.27188	34.3841	6.2129	0.283029
-1230	3.23212	34.3884	6.1683	0.269956
-1235	3.20543	34.3977	6.16217	0.281456
-1240	3.1934	34.4022	6.1104	0.262873
-1245	3.18127	34.4087	6.1181	0.275065
-1250	3.17236	34.4148	6.07567	0.274413
-1255	3.16379	34.4196	6.07932	0.277184
-1260	3.15453	34.4244	6.0605	0.275092
-1265	3.15205	34.4257	6.03984	0.275964
-1270	3.14861	34.4276	6.05789	0.275898
-1275	3.14681	34.4287	6.04282	0.267498
-1280	3.14548	34.4297	6.03252	0.262593
-1285	3.14358	34.4308	6.03579	0.269759
-1290	3.14084	34.4324	6.02803	0.268615
-1295	3.1341	34.4365	6.03655	0.27314
-1300	3.12946	34.439	6.01508	0.266465
-1305	3.12277	34.4426	6.00129	0.270617
-1310	3.10969	34.4501	5.99482	0.269915
-1315	3.09896	34.4564	5.96614	0.271313
-1320	3.08994	34.4619	5.9634	0.270332
-1325	3.08508	34.4644	5.97306	0.269756
-1330	3.07789	34.4675	5.96966	0.269303
-1335	3.06771	34.4729	5.95285	0.278607
-1340	3.0652	34.4749	5.94884	0.266041
-1345	3.05981	34.4823	5.9433	0.281255
-1350	3.06881	34.4907	5.93656	0.26904
-1355	3.05885	34.5053	6.0185	0.276535
-1360	3.04454	34.5166	6.00094	0.275975
-1365	3.03874	34.5206	5.98868	0.281765
-1370	3.03633	34.5225	6.01115	0.271277
-1375	3.03087	34.5263	5.99139	0.268173
-1380	3.02698	34.529	6.00315	0.271221
-1385	3.02527	34.5304	6.00617	0.269305
-1390	3.01284	34.5399	5.97365	0.2792
-1395	3.00926	34.5424	5.9929	0.277977
-1400	3.00857	34.543	6.00492	0.278189
-1405	3.00881	34.5431	6.00764	0.283271
-1410	3.00727	34.5445	6.00576	0.271253
-1415	3.00382	34.548	6.00019	0.271261
-1420	3.00218	34.5497	5.99926	0.275104
-1425	3.00121	34.5511	6.00502	0.272353
-1430	2.99174	34.557	6.01268	0.278775
-1435	2.98562	34.5599	6.00296	0.276325
-1440	2.98252	34.5618	5.99714	0.274897
-1445	2.98049	34.5635	6.0006	0.2791
-1450	2.96916	34.5703	5.97614	0.272655
-1455	2.96306	34.5746	5.97565	0.276903
-1460	2.96036	34.5775	5.98611	0.287378
-1465	2.95771	34.5814	5.98674	0.261606
-1470	2.95481	34.586	5.98057	0.260558
-1475	2.9515	34.5909	6.01989	0.276075
-1480	2.94933	34.5943	6.02045	0.27014
-1485	2.94685	34.5984	6.01112	0.271701
-1490	2.94654	34.5993	6.04025	0.275024
-1495	2.94459	34.6026	6.03709	0.278952
-1500	2.9426	34.6059	6.04687	0.272683
-1505	2.93993	34.6102	6.04182	0.275693
-1510	2.93895	34.6123	6.04069	0.268176
-1515	2.93803	34.6144	6.07121	0.274175
-1520	2.93724	34.6165	6.06835	0.278351
-1525	2.9359	34.6196	6.06467	0.270571
-1530	2.9332	34.6249	6.09948	0.270876
-1535	2.92781	34.6349	6.0954	0.276867
-1540	2.92581	34.639	6.12627	0.274882
-1545	2.92517	34.6404	6.15053	0.271258
-1550	2.92426	34.6428	6.13293	0.276644
-1555	2.92315	34.6453	6.14353	0.272875
-1560	2.92243	34.6474	6.15793	0.276877
-1565	2.92277	34.6474	6.16789	0.277541
-1570	2.92299	34.6475	6.1562	0.275544
-1575	2.92332	34.6479	6.15752	0.273727
-1580	2.92337	34.6483	6.16312	0.277305
-1585	2.92318	34.6495	6.15712	0.272086
-1590	2.92217	34.6521	6.16624	0.276937
-1595	2.92226	34.653	6.16713	0.272122
-1600	2.92197	34.6556	6.18449	0.2794
-1605	2.92141	34.6584	6.19171	0.267189
-1610	2.92046	34.661	6.20421	0.273019
-1615	2.91704	34.6675	6.23278	0.27551
-1620	2.91493	34.6714	6.23557	0.273664
-1625	2.91326	34.6743	6.22709	0.276502
-1630	2.90852	34.6821	6.25368	0.276766
-1635	2.90739	34.6843	6.28079	0.276801
-1640	2.90704	34.6865	6.28578	0.273064
-1645	2.90676	34.6896	6.28788	0.266987
-1650	2.90695	34.6912	6.30052	0.270939
-1655	2.90696	34.6931	6.33055	0.274568
-1660	2.90521	34.6984	6.33883	0.275281
-1665	2.90129	34.7021	6.34472	0.27529
-1670	2.9004	34.705	6.35206	0.277235
-1675	2.90166	34.7064	6.37575	0.272667
-1680	2.90051	34.7074	6.34993	0.278031
-1685	2.89581	34.7145	6.37616	0.278739
-1690	2.89261	34.7212	6.39276	0.281894
-1695	2.89177	34.7234	6.40086	0.267681
-1700	2.89075	34.7261	6.43449	0.280914
-1705	2.89031	34.7289	6.44349	0.278971
-1710	2.89076	34.7295	6.45512	0.275843
-1715	2.8899	34.7317	6.45033	0.282797
-1720	2.88915	34.7335	6.45912	0.281225
-1725	2.88894	34.7345	6.45643	0.282127
-1730	2.88839	34.7367	6.46393	0.275295
-1735	2.88823	34.7382	6.47114	0.270908
-1740	2.88827	34.7392	6.46831	0.267327
-1745	2.88664	34.7442	6.47313	0.278753
-1750	2.88538	34.748	6.52095	0.274655
-1755	2.88458	34.7509	6.53186	0.270541
-1760	2.88425	34.7527	6.55899	0.285513
-1765	2.88403	34.7542	6.53216	0.272875
-1770	2.88391	34.7554	6.55548	0.275251
-1775	2.88204	34.7606	6.55445	0.271431
-1780	2.88077	34.764	6.57099	0.273092
-1785	2.88069	34.7649	6.61214	0.270094
-1790	2.88042	34.7667	6.59554	0.274834
-1795	2.87983	34.7689	6.61626	0.286639
-1800	2.87966	34.7704	6.59915	0.271759
-1805	2.87988	34.7712	6.61579	0.273914
-1810	2.87983	34.7722	6.62331	0.278625
-1815	2.8797	34.7739	6.61234	0.274768
-1820	2.87946	34.776	6.62171	0.273589
-1825	2.87957	34.7771	6.63593	0.275202
-1830	2.87903	34.7801	6.63862	0.280594
-1835	2.87817	34.7834	6.6367	0.272496
-1840	2.87843	34.7844	6.68313	0.267638
-1845	2.87878	34.7855	6.67355	0.267741
-1850	2.87893	34.7861	6.67105	0.272852
-1855	2.87917	34.7868	6.69477	0.270911
-1860	2.87919	34.7885	6.66864	0.266673
-1865	2.87934	34.7895	6.69674	0.269629
-1870	2.87943	34.7902	6.69361	0.277115
-1875	2.87963	34.7911	6.69054	0.267581
-1880	2.88	34.7913	6.70977	0.272747
-1885	2.88029	34.7917	6.6963	0.277734
-1890	2.88033	34.7929	6.7179	0.270891
-1895	2.88022	34.794	6.72498	0.281179
-1900	2.87918	34.7961	6.72634	0.27892
-1905	2.87799	34.7982	6.75263	0.278787
-1910	2.87747	34.8	6.74178	0.272308
-1915	2.87752	34.8007	6.77683	0.269116
-1920	2.87778	34.8014	6.76985	0.274712
-1925	2.87803	34.8018	6.78272	0.272259
-1930	2.87825	34.8023	6.7679	0.271336
-1935	2.87849	34.803	6.78909	0.27678
-1940	2.87849	34.805	6.7707	0.278776
-1945	2.87769	34.8092	6.80447	0.279056
-1950	2.87633	34.8119	6.83887	0.26781
-1955	2.87616	34.8131	6.84823	0.275269
-1960	2.87564	34.815	6.84727	0.279022
-1965	2.8758	34.8156	6.8395	0.275944
-1970	2.87607	34.8159	6.86656	0.271653
-1975	2.87649	34.816	6.84205	0.273075
-1980	2.87677	34.8164	6.86319	0.275827
-1985	2.87715	34.8167	6.869	0.275391
-1990	2.87744	34.8169	6.87957	0.276663
-1995	2.87793	34.8171	6.87408	0.271598
